RETRACTION

## Retraction: Digital economy, scientific and technological innovation, and high-quality economic development: A mediating effect model based on the spatial perspective

The *PLOS One* Editors

The *PLOS One* Editors retract this article [1] because it was identified as one of a series of submissions for which we have concerns about compromised peer review.

The Editors have no evidence of any author involvement in the peer review concerns.

YL did not agree with the retraction. SZ either did not respond directly or could not be reached.

### Reference

1. Lu Y, Zhu S. RETRACTED: Digital economy, scientific and technological innovation, and high-quality economic development: a mediating effect model based on the spatial perspective. *PLoS One*. 2022;17(11):e0277245. <https://doi.org/10.1371/journal.pone.0277245> PMID: [36342932](https://pubmed.ncbi.nlm.nih.gov/36342932/)

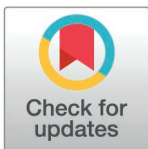

### OPEN ACCESS

**Citation:** The *PLOS One* Editors (2026) Retraction: Digital economy, scientific and technological innovation, and high-quality economic development: A mediating effect model based on the spatial perspective. *PLoS One* 21(5): e0349728. <https://doi.org/10.1371/journal.pone.0349728>

**Published:** May 28, 2026

**Copyright:** © 2026 The *PLOS One* Editors. This is an open access article distributed under the terms of the [Creative Commons Attribution License](https://creativecommons.org/licenses/by/4.0/), which permits unrestricted use, distribution, and reproduction in any medium, provided the original author and source are credited.
